# Supplementary material
Source: publisher figshare collection journal article supplement (https://sage.figshare.com/ndownloader/files/22661324)
Supplement: Supplementary file 1 [file 22661324]

Supplement File 2: Discharge opioid prescription characteristics

|                              | <b>All discharge prescriptions<sup>a</sup></b><br>(n=71), <i>N</i> (%) | <b>Discharge prescriptions with opioids<sup>b</sup></b><br>(n=32), <i>N</i> (%) |
|------------------------------|------------------------------------------------------------------------|---------------------------------------------------------------------------------|
| <b>Type of opioid</b>        |                                                                        |                                                                                 |
| Hydrocodone                  | 3 (4)                                                                  | 3 (9.3)                                                                         |
| Oxycodone                    | 29 (41)                                                                | 29 (90.6)                                                                       |
| None                         | 39 (55)                                                                | -                                                                               |
| <b>Non-opioid prescribed</b> |                                                                        |                                                                                 |
| Any                          | 41 (57.7)                                                              | 26 (72.2)                                                                       |
| Acetaminophen                | 31 (43.7)                                                              | 23 (71.9)                                                                       |
| NSAID                        | 9 (12.7)                                                               | 4 (12.5)                                                                        |
| GABA analog                  | 8 (11.3)                                                               | 4 (12.5)                                                                        |
| None                         | 30 (42.3)                                                              | 6 (18.8)                                                                        |
| <b>Laxative</b>              |                                                                        |                                                                                 |
| Any                          | 26 (36.6)                                                              | 20 (62.5)                                                                       |
| Senna                        | 6 (8.5)                                                                | 3 (9.4)                                                                         |
| Docusate                     | 16 (22.5)                                                              | 14 (43.8)                                                                       |
| General regimen <sup>c</sup> | 4 (5.6)                                                                | 2 (6.3)                                                                         |
| Other                        | 4 (5.6)                                                                | 1 (3.1)                                                                         |
| None                         | 45 (63.4)                                                              | 12 (3.8)                                                                        |

Characteristics of discharge opioid prescriptions. Characteristics of discharge prescriptions reviewed, in (a) all prescriptions, regardless if an opioid prescription was included and (b) only prescriptions that included opioids. (c) General regimen refers to a general recommendation in patient discharge handouts, “bowel regimen.”
